# Supplementary material for: Puppy Socialisation Experiences in Relation to Age and COVID-19 Lockdown Restrictions in the UK and ROI
Source: MDPI journal article supplement (doi:10.3390/ani14101471), 2024-05-15
Supplement: s1 [file s1]

## Supplementary Materials:

Question included in the 'Settling In', '12-week' and '16-week' questionnaires that was used to explore the types of socialisation experiences of puppies and the effect of age and the COVID-19 lockdown.

### Q. In the past seven days my puppy has had the following experiences....

*Note: By encountered we mean experienced/been aware of the situation, person, or animals in the question.*

|                                                                                                         | Tick one box for each row |                          |                          |
|---------------------------------------------------------------------------------------------------------|---------------------------|--------------------------|--------------------------|
|                                                                                                         | I'm unsure                | Yes                      | No                       |
| Being out in public on the ground                                                                       | <input type="checkbox"/>  | <input type="checkbox"/> | <input type="checkbox"/> |
| Being out in public in my arms                                                                          | <input type="checkbox"/>  | <input type="checkbox"/> | <input type="checkbox"/> |
| Meeting/hearing the postman/woman                                                                       | <input type="checkbox"/>  | <input type="checkbox"/> | <input type="checkbox"/> |
| Encountering livestock                                                                                  | <input type="checkbox"/>  | <input type="checkbox"/> | <input type="checkbox"/> |
| Being put in a stationary car or other vehicle                                                          | <input type="checkbox"/>  | <input type="checkbox"/> | <input type="checkbox"/> |
| Travelling in a moving car or other vehicle                                                             | <input type="checkbox"/>  | <input type="checkbox"/> | <input type="checkbox"/> |
| Going in the garden/yard                                                                                | <input type="checkbox"/>  | <input type="checkbox"/> | <input type="checkbox"/> |
| Hearing loud noises (for example bangs, fireworks etc.)                                                 | <input type="checkbox"/>  | <input type="checkbox"/> | <input type="checkbox"/> |
| Hearing voices raised or arguments in the house                                                         | <input type="checkbox"/>  | <input type="checkbox"/> | <input type="checkbox"/> |
| Being near light traffic (for example cars passing, quiet road), except when inside a vehicle           | <input type="checkbox"/>  | <input type="checkbox"/> | <input type="checkbox"/> |
| Being near heavy traffic (for example lorries, trucks passing, busy road), except when inside a vehicle | <input type="checkbox"/>  | <input type="checkbox"/> | <input type="checkbox"/> |
| Encountering a person riding a bicycle                                                                  | <input type="checkbox"/>  | <input type="checkbox"/> | <input type="checkbox"/> |
| Visiting other houses than the one he/she lives in                                                      | <input type="checkbox"/>  | <input type="checkbox"/> | <input type="checkbox"/> |
| Having a collar put on                                                                                  | <input type="checkbox"/>  | <input type="checkbox"/> | <input type="checkbox"/> |
| Having a harness put on                                                                                 | <input type="checkbox"/>  | <input type="checkbox"/> | <input type="checkbox"/> |
| Having a lead put on                                                                                    | <input type="checkbox"/>  | <input type="checkbox"/> | <input type="checkbox"/> |

Questions included in the '6-month' questionnaires that were used to explore the recency of socialisation experiences of puppies and the effect of the COVID-19 lockdown.

### Q1. Approximately how many days is it since your puppy met a new adult he/she didn't previously know when they visited the household...

*Note: By 'meeting people' we mean if your puppy was in the same room as a person and/or if outside and within approximately 3 meters/10 feet of a person.*

Select one response:

Today

One number between 2 and 28 days

More than 28 days

I don't know/I can't remember

Not applicable

### Q2. Approximately how many days is it since your puppy met a new adult she didn't previously know when outside the household...

*Note: By 'meeting people' we mean if your puppy was in the same room as a person and/or if outside and within approximately 3 meters/10 feet of a person.*

|                                                                                                                                |                                                                                                                                                          |
|--------------------------------------------------------------------------------------------------------------------------------|----------------------------------------------------------------------------------------------------------------------------------------------------------|
| <u>Select one response:</u>                                                                                                    |                                                                                                                                                          |
| Today                                                                                                                          |                                                                                                                                                          |
| One number between 2 and 28 days                                                                                               |                                                                                                                                                          |
| More than 28 days                                                                                                              |                                                                                                                                                          |
| I don't know/I can't remember                                                                                                  |                                                                                                                                                          |
| Not applicable                                                                                                                 |                                                                                                                                                          |
| <b>Q3. In the last two months, (excluding children living in our household), how many days is it since your puppy met...</b>   |                                                                                                                                                          |
| <i>Note: By 'met' we mean children that your puppy has interacted with or been aware of whilst in close proximity to them.</i> |                                                                                                                                                          |
| No children                                                                                                                    | <u>Select one response per row:</u><br>Today<br>One number between 2 and 28 days<br>More than 28 days<br>I don't know/I can't remember<br>Not applicable |
| A baby                                                                                                                         |                                                                                                                                                          |
| A toddler to 4 year old child                                                                                                  |                                                                                                                                                          |
| A child or children aged 5-10 years                                                                                            |                                                                                                                                                          |
| A child or children aged 11-15 years                                                                                           |                                                                                                                                                          |
| A child or children that I couldn't guess the age/ages of                                                                      |                                                                                                                                                          |
| I don't know/can't remember                                                                                                    |                                                                                                                                                          |
| <b>Q4. Approximately how many days is it since your puppy met a new dog outside the household...</b>                           |                                                                                                                                                          |
| <u>Select one response:</u>                                                                                                    |                                                                                                                                                          |
| Today                                                                                                                          |                                                                                                                                                          |
| One number between 2 and 28 days                                                                                               |                                                                                                                                                          |
| More than 28 days                                                                                                              |                                                                                                                                                          |
| I don't know/I can't remember                                                                                                  |                                                                                                                                                          |
| Not applicable                                                                                                                 |                                                                                                                                                          |
| <b>Q5. Approximately how many days is it since your puppy met a dog that she knows...</b>                                      |                                                                                                                                                          |
| <u>Select one response:</u>                                                                                                    |                                                                                                                                                          |
| Today                                                                                                                          |                                                                                                                                                          |
| One number between 2 and 28 days                                                                                               |                                                                                                                                                          |
| More than 28 days                                                                                                              |                                                                                                                                                          |
| I don't know/I can't remember                                                                                                  |                                                                                                                                                          |
| Not applicable                                                                                                                 |                                                                                                                                                          |

**Table S1.** Results of the reduced beta regression model for the socialisation experiences of 8 to 19-week-old puppies. Estimates, standard error, results of significance tests (Wald's  $z$  approximation), confidence intervals and the minimum and maximum of model estimates derived after excluding individuals one at a time.

| Term                              | Estimate | SE    | z      | p       | 95% CI |        | Min    | Max    |
|-----------------------------------|----------|-------|--------|---------|--------|--------|--------|--------|
|                                   |          |       |        |         | Lower  | Upper  |        |        |
| Intercept                         | 0.497    | 0.021 | 23.196 | < 0.001 | 0.458  | 0.537  | 0.494  | 0.499  |
| Age: 84-105 days <sup>1</sup>     | 0.736    | 0.021 | 34.791 | < 0.001 | 0.674  | 0.774  | 0.734  | 0.738  |
| Age: 112-133 days <sup>1</sup>    | 1.072    | 0.022 | 49.365 | < 0.001 | 1.029  | 1.109  | 1.069  | 1.075  |
| Phase: Lockdown <sup>2</sup>      | -0.059   | 0.031 | -1.923 | 0.054   | -0.119 | 0.005  | -0.064 | -0.054 |
| Phase: Post-lockdown <sup>2</sup> | -0.070   | 0.026 | -2.678 | 0.007   | -0.123 | -0.022 | -0.073 | -0.067 |

<sup>1</sup> Age: 56-77 days as reference level.

<sup>2</sup> Phase: Pre-lockdown as reference level.

**Table S2.** Results of the binomial regression model for meeting a new adult when they visited the household. Estimates, standard error, results of significance tests (Wald's  $z$  approximation) and confidence intervals.

| Term                              | Estimate | SE    | $z$     | $p$     | 95% CI |        |
|-----------------------------------|----------|-------|---------|---------|--------|--------|
|                                   |          |       |         |         | Lower  | Upper  |
| Intercept                         | 0.698    | 0.049 | 14.325  | < 0.001 | 0.603  | 0.794  |
| Phase: Lockdown <sup>1</sup>      | -1.005   | 0.107 | -9.351  | < 0.001 | -1.217 | -0.795 |
| Phase: Post-lockdown <sup>1</sup> | -0.231   | 0.093 | -2.474  | 0.013   | -0.413 | -0.047 |
| Days: 8 or more <sup>2</sup>      | -1.492   | 0.069 | -21.473 | < 0.001 | -1.629 | -1.357 |
| Days: Not met <sup>2</sup>        | -4.537   | 0.167 | -27.156 | < 0.001 | -4.880 | -4.223 |
| Lockdown $\times$ 8 or more       | 1.737    | 0.152 | 11.455  | < 0.001 | 1.440  | 2.035  |
| Post-lockdown $\times$ 8 or more  | 0.416    | 0.133 | 3.127   | 0.002   | 0.155  | 0.677  |
| Lockdown $\times$ Not met         | 2.554    | 0.253 | 10.099  | < 0.001 | 2.057  | 3.051  |
| Post-lockdown $\times$ Not met    | 0.692    | 0.285 | 2.246   | 0.015   | 0.119  | 1.241  |

<sup>1</sup> Phase: Pre-lockdown as reference level.

<sup>2</sup> Days: 1 to 7 as reference level.

**Table S3.** Results of the binomial regression model for meeting a new adult when outside of the household. Estimates, standard error, results of significance tests (Wald's  $z$  approximation) and confidence intervals.

| Term                              | Estimate | SE    | $z$     | $p$     | 95% CI |        |
|-----------------------------------|----------|-------|---------|---------|--------|--------|
|                                   |          |       |         |         | Lower  | Upper  |
| Intercept                         | 2.695    | 0.092 | 29.393  | < 0.001 | 2.520  | 2.879  |
| Phase: Lockdown <sup>1</sup>      | -0.486   | 0.179 | -2.715  | 0.007   | -0.830 | -0.127 |
| Phase: Post-lockdown <sup>1</sup> | 0.106    | 0.185 | 0.574   | 0.566   | -0.248 | 0.480  |
| Days: 8 or more <sup>2</sup>      | -5.542   | 0.134 | -41.283 | < 0.001 | -5.811 | -5.284 |
| Days: Not met <sup>2</sup>        | -7.458   | 0.260 | -28.655 | < 0.001 | -8.004 | -6.978 |
| Lockdown $\times$ 8 or more       | 1.000    | 0.260 | 3.843   | < 0.001 | 0.481  | 1.503  |
| Post-lockdown $\times$ 8 or more  | -0.197   | 0.270 | -0.730  | 0.466   | -0.739 | 0.323  |
| Lockdown $\times$ Not met         | 0.705    | 0.542 | 1.302   | 0.193   | -0.460 | 1.704  |
| Post-lockdown $\times$ Not met    | -0.301   | 0.543 | -0.554  | 0.580   | -1.469 | 0.701  |

<sup>1</sup> Phase: Pre-lockdown as reference level.

<sup>2</sup> Days: 1 to 7 as reference level.

**Table S4.** Results of the binomial regression model for meeting for meeting a new dog from outside of the household. Estimates, standard error, results of significance tests (Wald's  $z$  approximation) and confidence intervals.

| Term                              | Estimate | SE    | $z$     | $p$     | 95% CI |        |
|-----------------------------------|----------|-------|---------|---------|--------|--------|
|                                   |          |       |         |         | Lower  | Upper  |
| Intercept                         | 2.365    | 0.080 | 29.396  | < 0.001 | 2.211  | 2.526  |
| Phase: Lockdown <sup>1</sup>      | 0.090    | 0.189 | 0.476   | 0.634   | -0.269 | 0.474  |
| Phase: Post-lockdown <sup>1</sup> | 0.148    | 0.165 | 0.898   | 0.369   | -0.168 | 0.480  |
| Days: 8 or more <sup>2</sup>      | -4.846   | 0.117 | -41.547 | < 0.001 | -5.078 | -4.621 |
| Days: Not met <sup>2</sup>        | -7.108   | 0.257 | -27.708 | < 0.001 | -7.648 | -6.636 |
| Lockdown $\times$ 8 or more       | -0.156   | 0.273 | -0.572  | 0.567   | -0.706 | 0.367  |
| Post-lockdown $\times$ 8 or more  | -0.410   | 0.244 | -1.678  | 0.093   | -0.899 | 0.060  |
| Lockdown $\times$ Not met         | -0.391   | 0.656 | -0.595  | 0.552   | -1.888 | 0.770  |
| Post-lockdown $\times$ Not met    | 0.369    | 0.434 | 0.851   | 0.394   | -0.513 | 1.203  |

<sup>1</sup> Phase: Pre-lockdown as reference level.

<sup>2</sup> Days: 1 to 7 as reference level.

**Table S5.** Results of the binomial regression model for meeting a familiar dog (defined as a dog that has been met at least twice before). Estimates, standard error, results of significance tests (Wald's  $z$  approximation) and confidence intervals.

| Term                              | Estimate | SE    | $z$     | $p$     | 95% CI |        |
|-----------------------------------|----------|-------|---------|---------|--------|--------|
|                                   |          |       |         |         | Lower  | Upper  |
| Intercept                         | 1.158    | 0.054 | 21.561  | < 0.001 | 1.053  | 1.264  |
| Phase: Lockdown <sup>1</sup>      | -0.164   | 0.118 | -1.387  | 0.166   | -0.393 | 0.070  |
| Phase: Post-lockdown <sup>1</sup> | -0.045   | 0.104 | -0.433  | 0.665   | -0.248 | 0.161  |
| Days: 8 or more <sup>2</sup>      | -2.654   | 0.080 | -33.198 | < 0.001 | -2.812 | -2.498 |
| Days: Not met <sup>2</sup>        | -3.980   | 0.113 | -35.203 | < 0.001 | -4.207 | -3.763 |
| Lockdown $\times$ 8 or more       | 0.149    | 0.179 | 0.831   | 0.406   | -0.206 | 0.497  |
| Post-lockdown $\times$ 8 or more  | 0.040    | 0.156 | 0.255   | 0.799   | -0.268 | 0.343  |
| Lockdown $\times$ Not met         | 0.664    | 0.225 | 2.953   | 0.003   | 0.216  | 1.099  |
| Post-lockdown $\times$ Not met    | 0.205    | 0.212 | 0.964   | 0.335   | -0.219 | 0.615  |

<sup>1</sup> Phase: Pre-lockdown as reference level.

<sup>2</sup> Days: 1 to 7 as reference level.

**Table S6.** Results of the binomial regression model for meeting a child/children. Estimates, standard error, results of significance tests (Wald's  $z$  approximation) and confidence intervals.

| Term                              | Estimate | SE    | $z$     | $p$     | 95% CI |        |
|-----------------------------------|----------|-------|---------|---------|--------|--------|
|                                   |          |       |         |         | Lower  | Upper  |
| Intercept                         | 0.944    | 0.054 | 17.553  | < 0.001 | 0.840  | 1.051  |
| Phase: Lockdown <sup>1</sup>      | -0.048   | 0.124 | -0.384  | 0.701   | -0.288 | 0.198  |
| Phase: Post-lockdown <sup>1</sup> | -0.145   | 0.105 | -1.385  | 0.166   | -0.350 | 0.062  |
| Days: 8 or more <sup>2</sup>      | -2.157   | 0.079 | -27.399 | < 0.001 | -2.312 | -2.003 |
| Days: Not met <sup>2</sup>        | -3.873   | 0.122 | -31.619 | < 0.001 | -4.119 | -3.638 |
| Lockdown $\times$ 8 or more       | 0.099    | 0.181 | 0.546   | 0.585   | -0.259 | 0.451  |
| Post-lockdown $\times$ 8 or more  | 0.152    | 0.155 | 0.980   | 0.327   | -0.154 | 0.454  |
| Lockdown $\times$ Not met         | 0.058    | 0.283 | 0.206   | 0.837   | -0.518 | 0.596  |
| Post-lockdown $\times$ Not met    | 0.628    | 0.216 | 2.904   | 0.004   | 0.198  | 1.047  |

<sup>1</sup> Phase: Pre-lockdown as reference level.

<sup>2</sup> Days: 1 to 7 as reference level.
